# Supplementary material for: Uncovering per- and polyfluoroalkyl substances (PFAS) with nontargeted ion mobility spectrometry–mass spectrometry analyses
Source: PubMed Central journal article supplement — Sci Adv. 2023 Oct 25;9(43):eadj7048. doi: 10.1126/sciadv.adj7048 (PMC10599621; doi:10.1126/sciadv.adj7048), 2023-10-25
Supplement: sciadv.adj7048_sm.pdf [file sciadv.adj7048_sm.pdf]

Supplementary Materials for  
**Uncovering per- and polyfluoroalkyl substances (PFAS) with nontargeted ion  
mobility spectrometry–mass spectrometry analyses**

Kaylie I. Kirkwood-Donelson *et al.*

Corresponding author: Erin S. Baker, [erinmsb@unc.edu](mailto:erinmsb@unc.edu)

*Sci. Adv.* **9**, eadj7048 (2023)  
DOI: 10.1126/sciadv.adj7048

**This PDF file includes:**

Figs. S1 to S20  
Tables S1 to S5

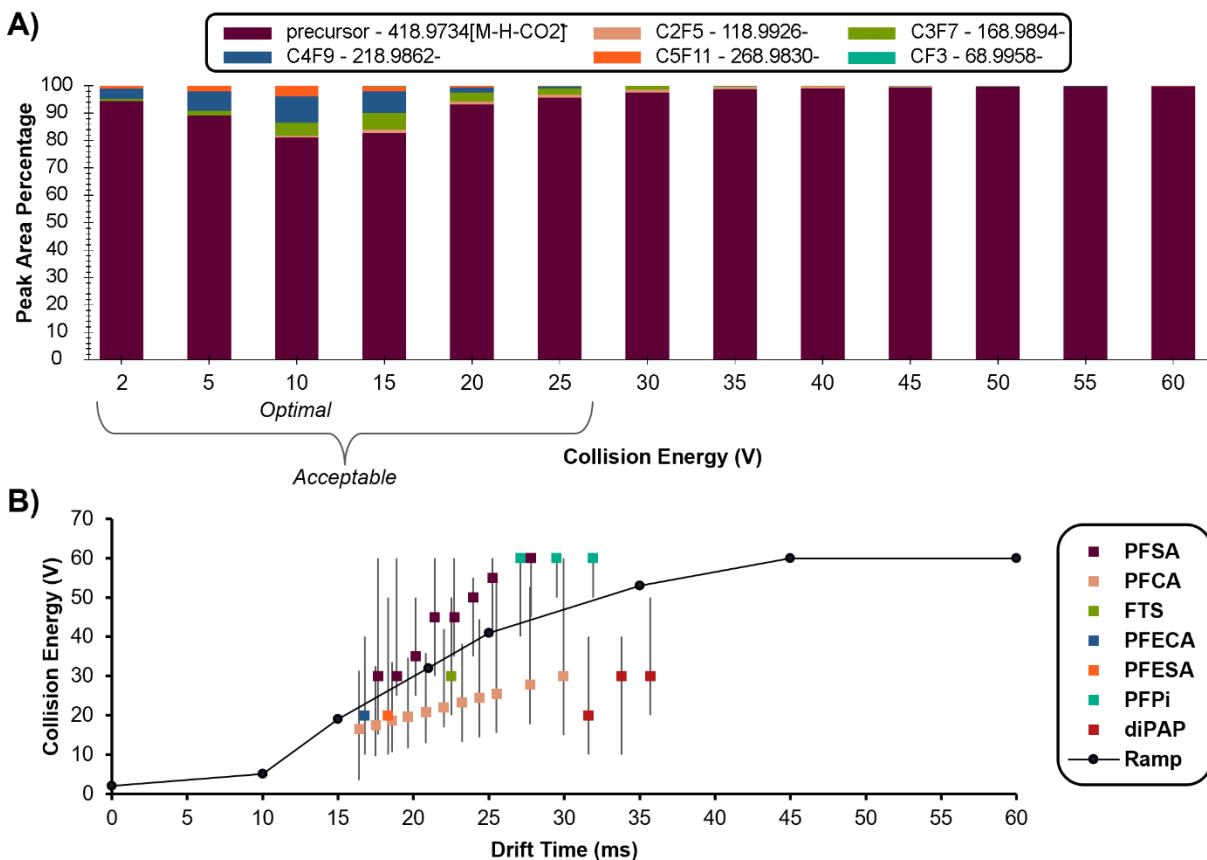

**Fig. S1.**

Collision energy (CE) ramp optimization. **(A)** Total peak area percentages of PFNA fragments demonstrating the determination of the optimal CE value (10 V) and acceptable CE range (2-25 V) for a given PFAS. **(B)** Drift time dependent CE ramp. The square point and “error bars” indicate the optimal CE value and acceptable CE range for each standard tested. The drift time plotted for each standard is the average value across all injections.

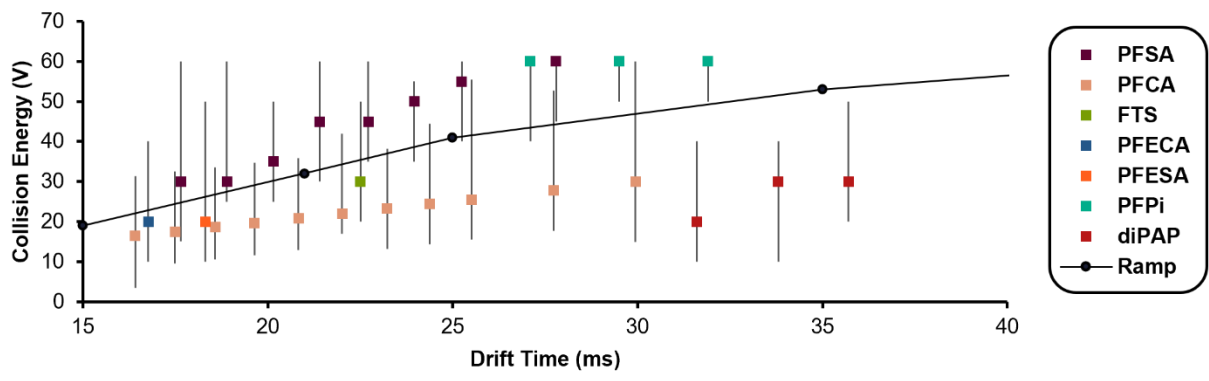

**Fig. S2.**

Drift time dependent CE ramp from 15-40 ms. The square point and “error bars” indicate the optimal CE value and acceptable CE range for each standard tested.

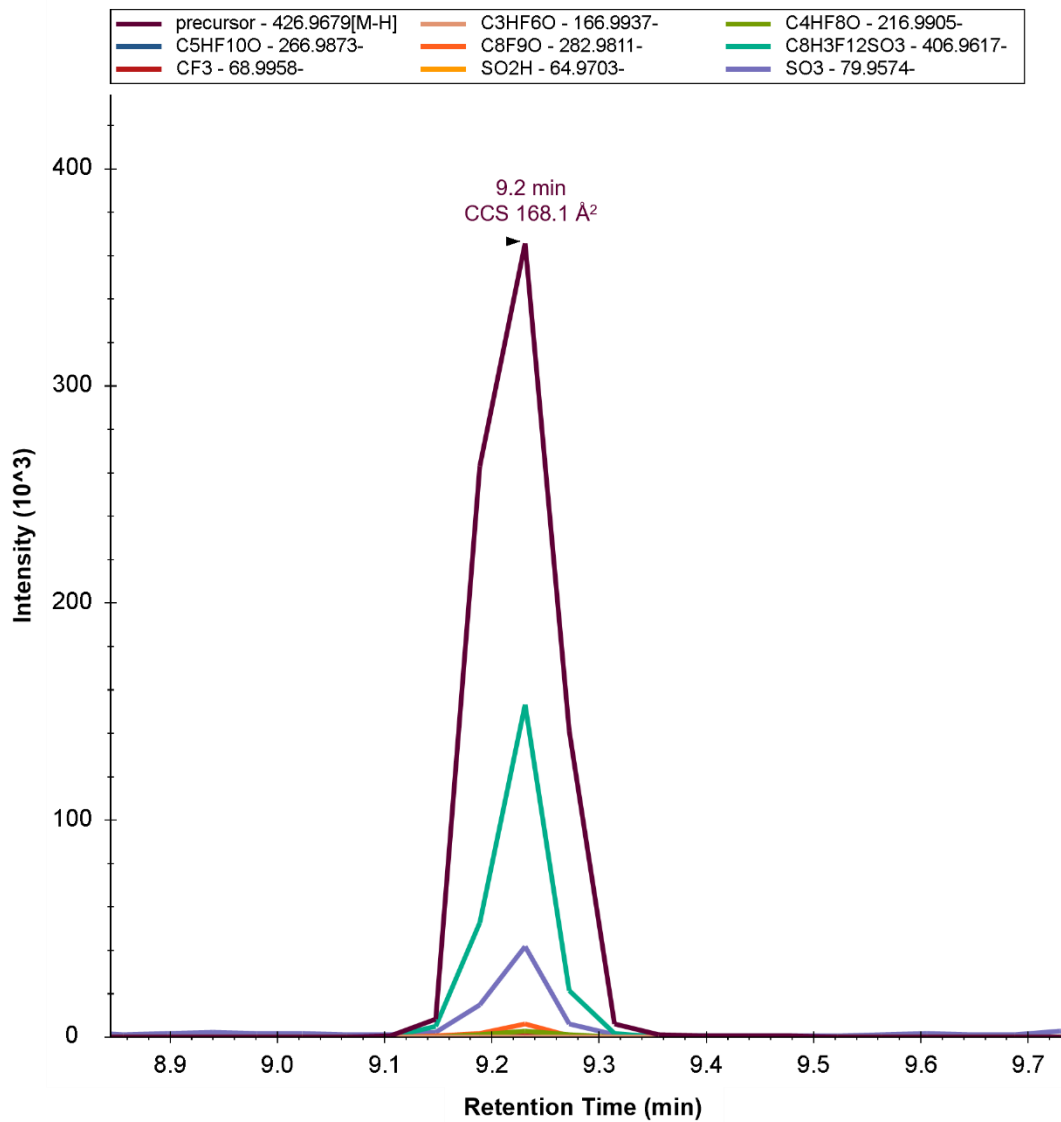

**Fig. S3.**

Extracted ion chromatogram for 6:2 FTS precursor and fragment ions in plant material extract.

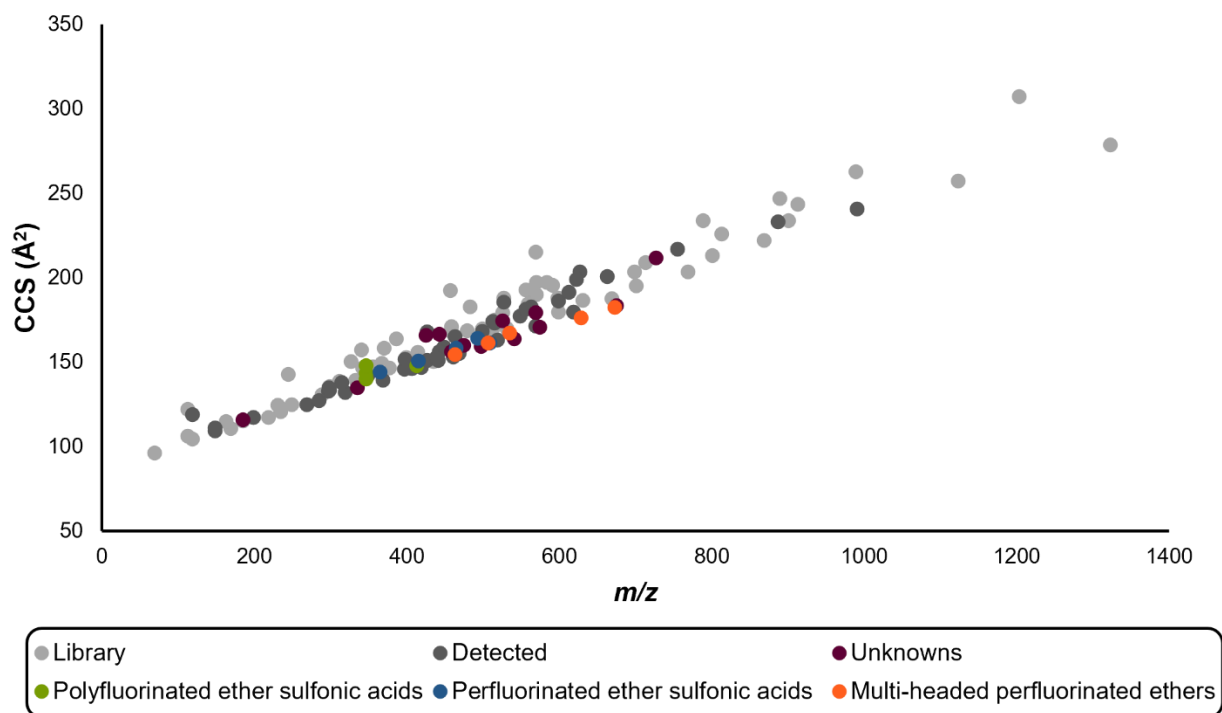

**Fig. S4.**

Collision cross section versus mass-to-charge ratios of PFAS. Gray compounds are known PFAS from the LC-IMS-MS targeted PFAS library that were either detected (dark gray) or not detected (light gray) in the aquatic passive samplers. Colored compounds are unknown features that were either not identified (purple) or were assigned proposed structures (green, blue and orange).

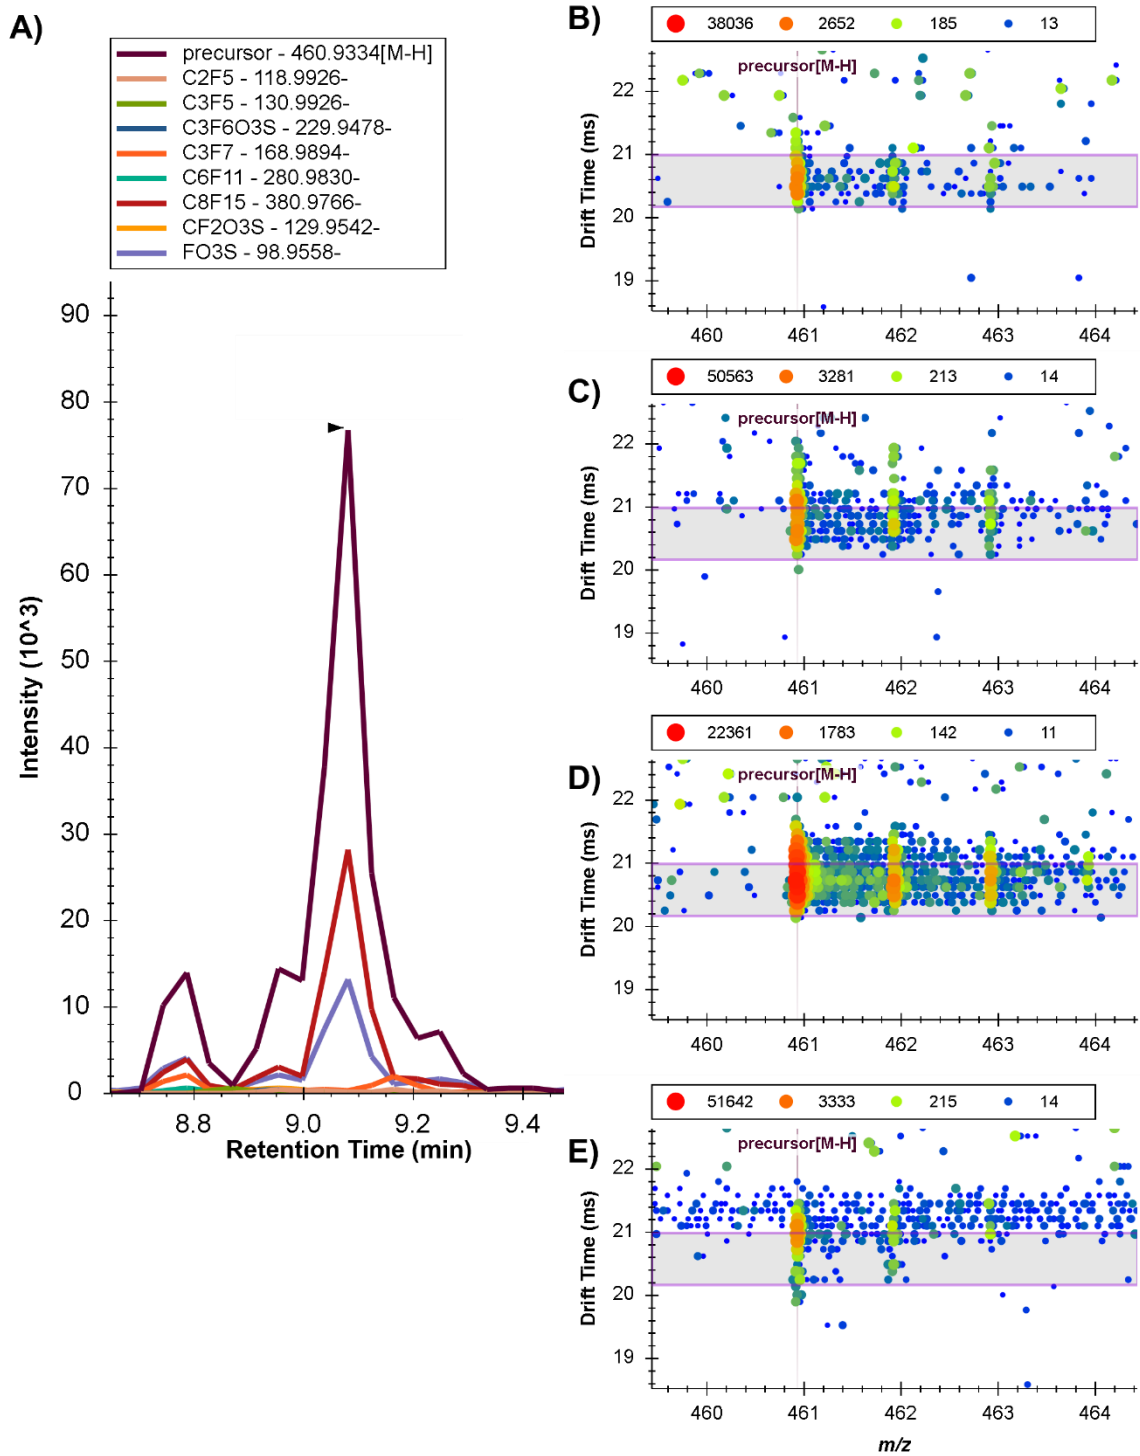

**Fig. S5.**

U-PFOS LC-IMS-CID-MS data. (A) Extracted ion chromatogram for the precursor and eight observed fragment ions. Precursor IMS-MS abundance maps at (B) 8.8 min, (C) 8.9 min, (D) 9.1 min, and (E) 9.2 min with drift time filtering windows set by the known PFECHS CCS of 153.3 Å<sup>2</sup>.

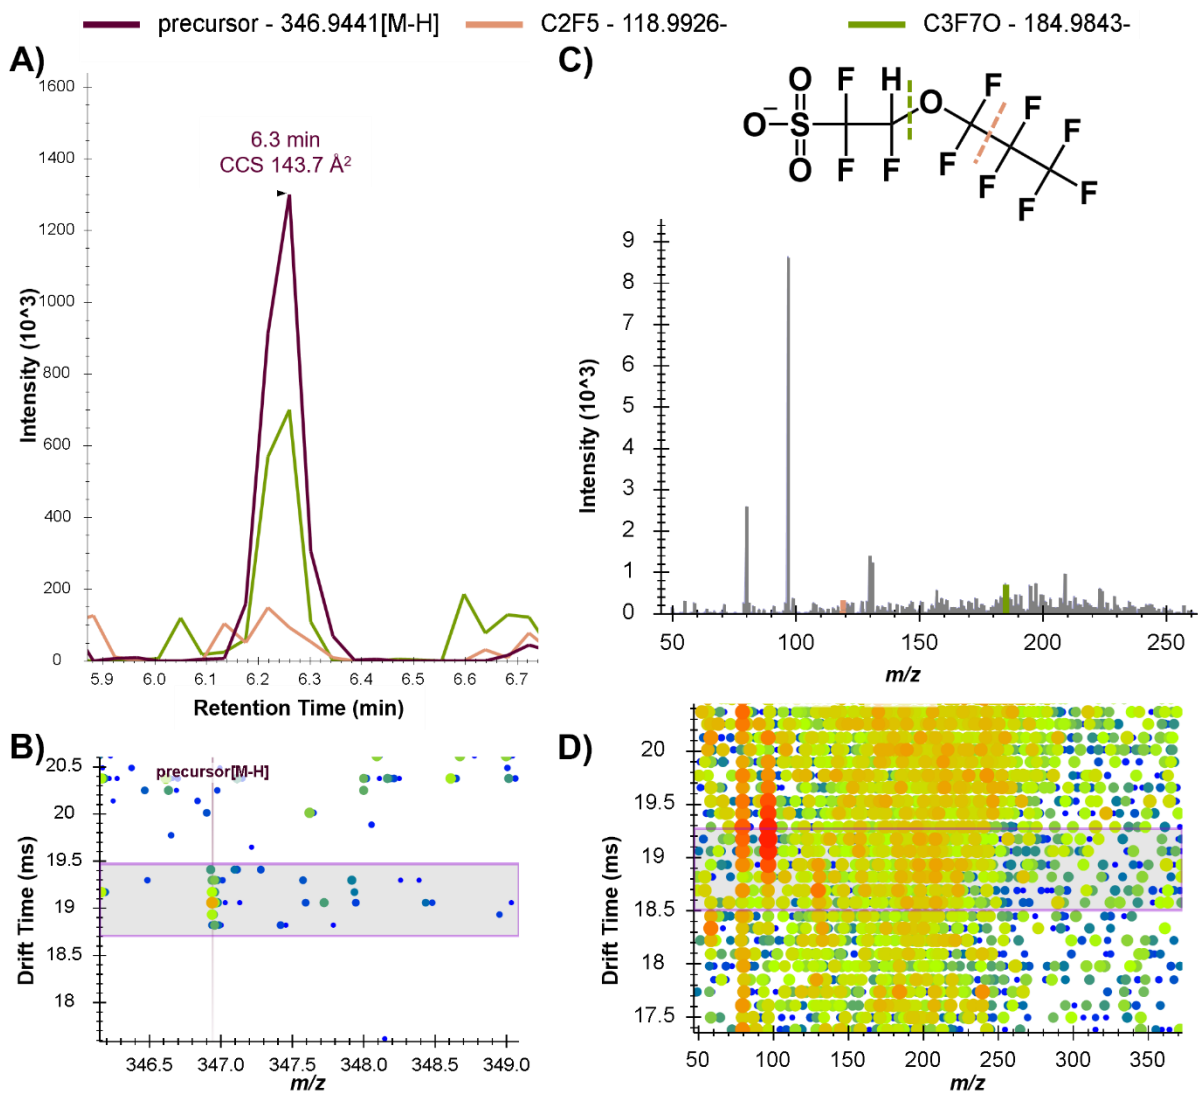

**Fig. S6.**

Compound 1 LC-IMS-CID-MS data. **(A)** Extracted ion chromatogram for the precursor and two fragment ions. Two isomers with different CCS values and fragments were proposed to be compound 2. **(B)** Precursor IMS-MS abundance map. **(C)** MS/MS spectrum with annotated fragments. **(D)** IMS-MS/MS abundance map displaying partially interfering fragments from a co-eluting ion at a higher drift time.

Note: Nonspecific sulfonate fragments were not annotated here but were detected.

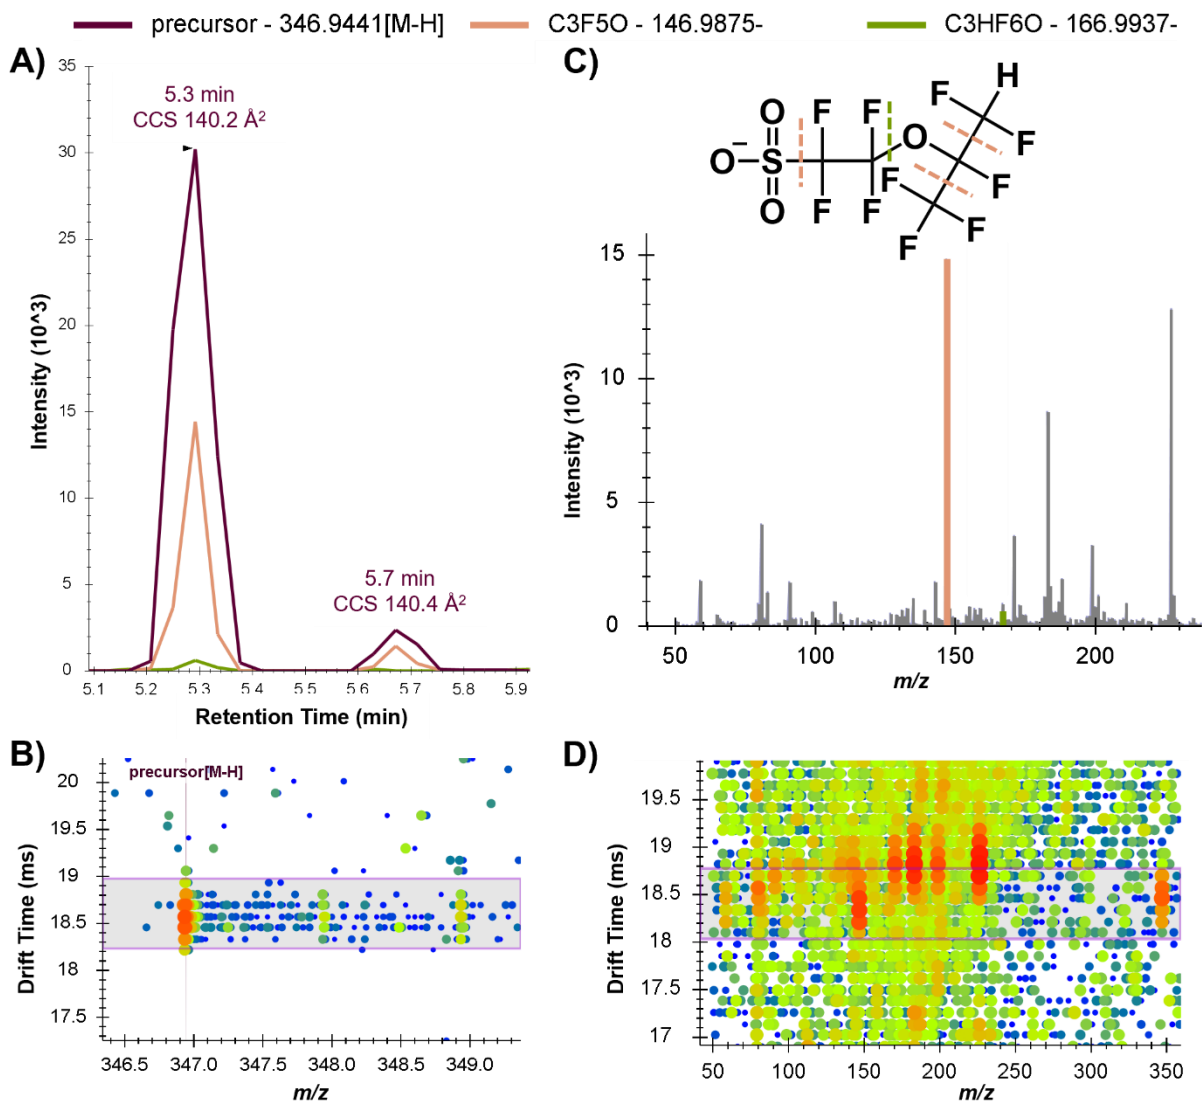

**Fig. S7.**

Compound 2 LC-IMS-CID-MS data. **(A)** Extracted ion chromatogram for the precursor and two fragment ions. Two potential isomers were detected at 5.3 and 5.7 minutes with similar CCS and fragments. A third isomer with dissimilar CCS and fragments was determined to be compound 1. **(B)** Precursor IMS-MS abundance map. **(C)** MS/MS spectrum with annotated fragments. **(D)** IMS-MS/MS abundance map displaying partially interfering fragments from a co-eluting ion at a higher drift time.

Note: Nonspecific sulfonate fragments were not annotated here but were detected.





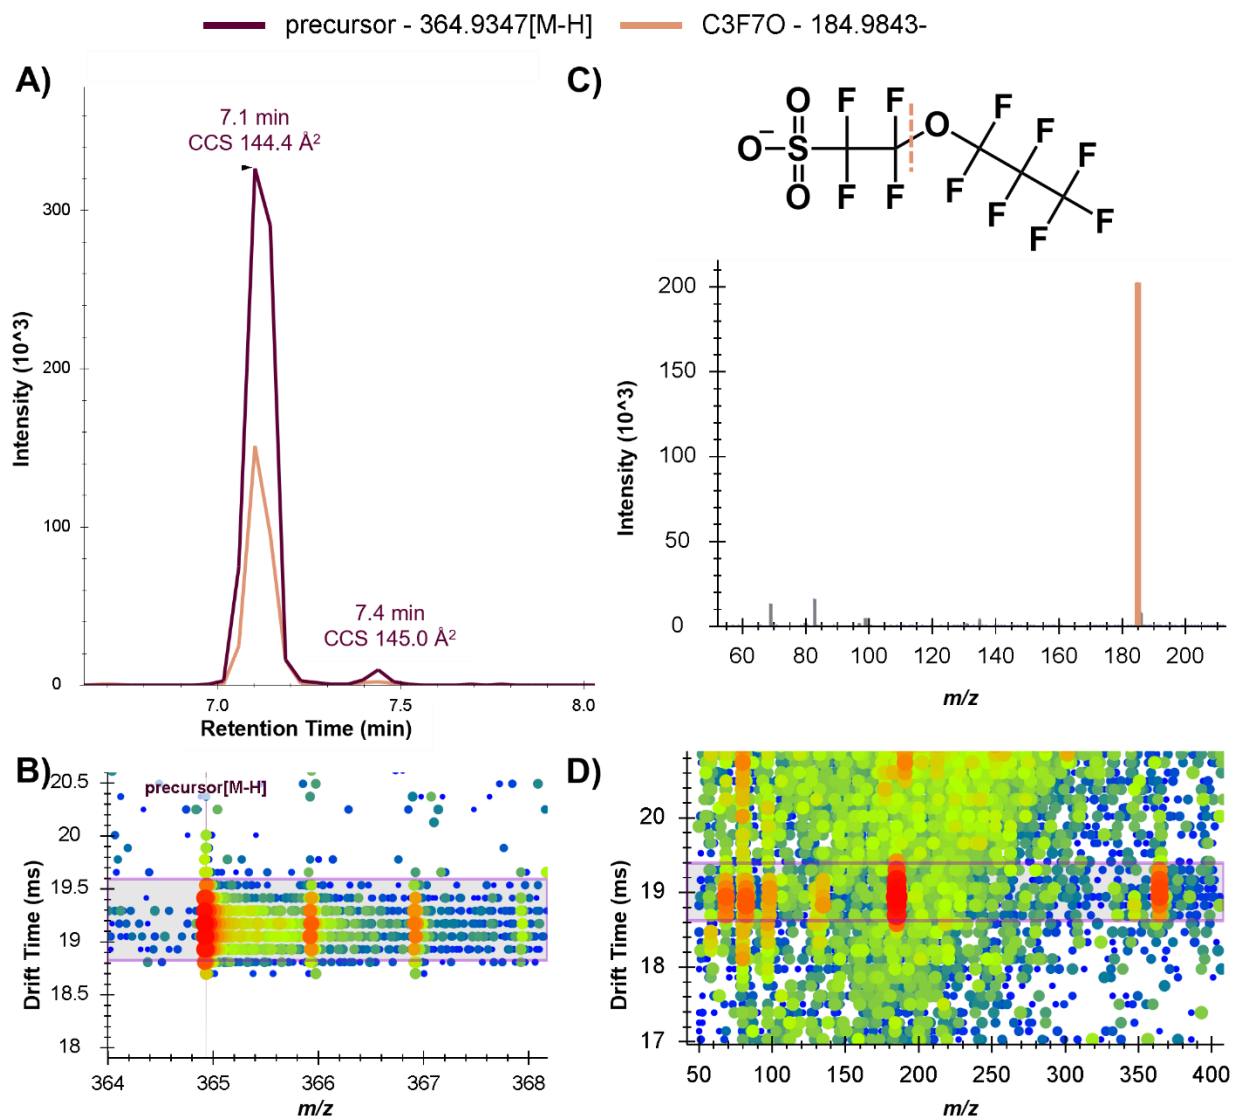

**Fig. S9.**

Compound 4 LC-IMS-CID-MS data. **(A)** Extracted ion chromatogram for the precursor and fragment ion. Two potential isomers were detected at 7.1 and 7.4 minutes with similar CCS and fragments. **(B)** Precursor IMS-MS abundance map. **(C)** MS/MS spectrum with an annotated fragment. **(D)** IMS-MS/MS abundance map.

Note: Nonspecific sulfonate fragments were not annotated here but were detected.

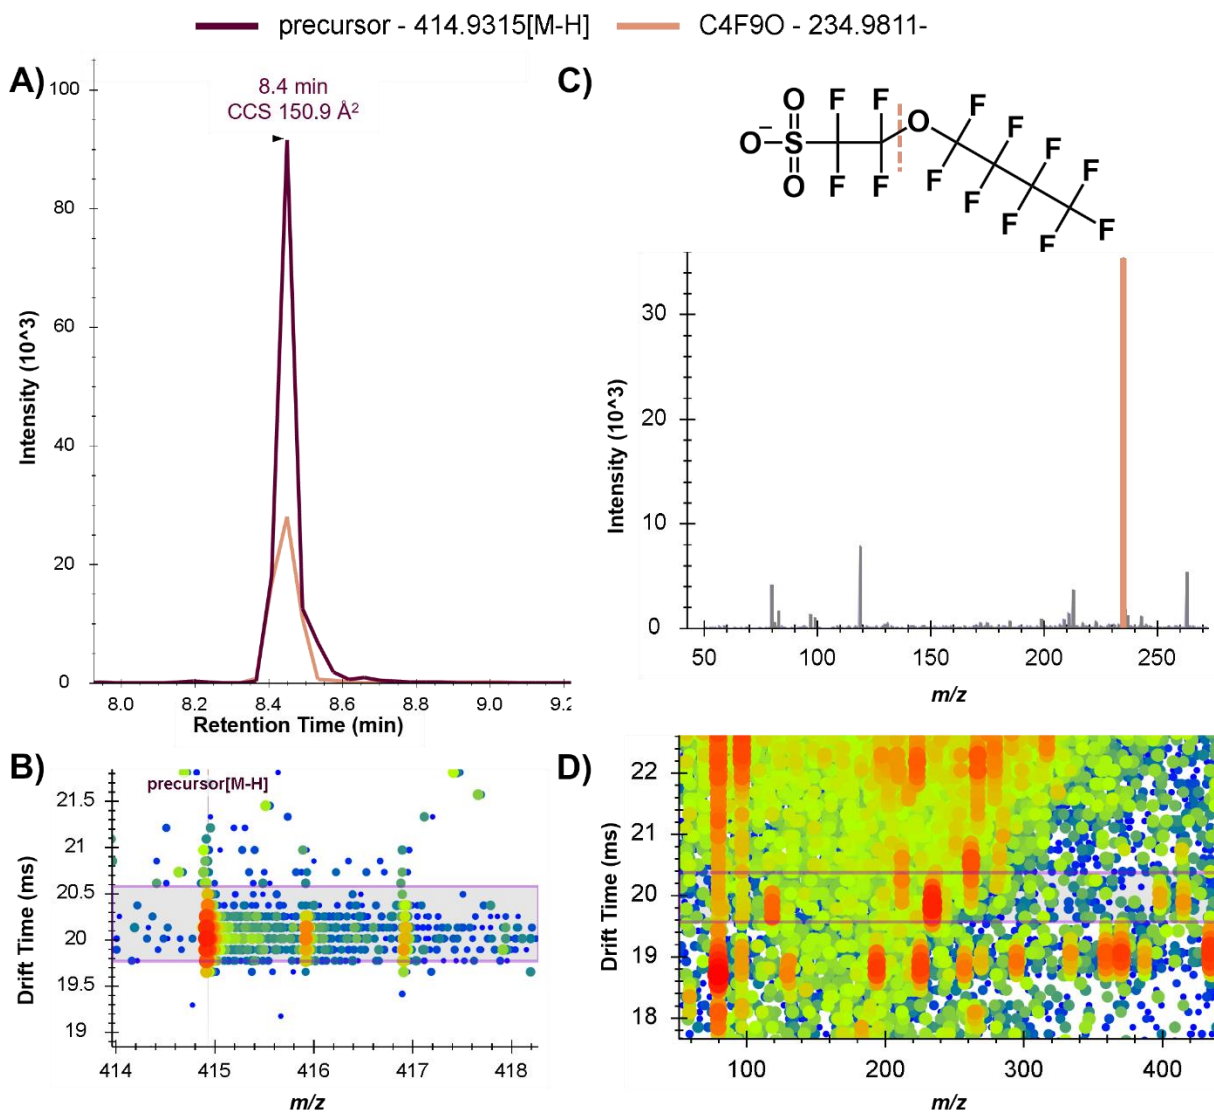

**Fig. S10.**

Compound 5 LC-IMS-CID-MS data. (A) Extracted ion chromatogram for the precursor and fragment ion. (B) Precursor IMS-MS abundance map. (C) MS/MS spectrum with an annotated fragment. (D) IMS-MS/MS abundance map displaying partially interfering fragments from a co-eluting ion at a higher drift time.

Note: Nonspecific sulfonate fragments were not annotated here but were detected.

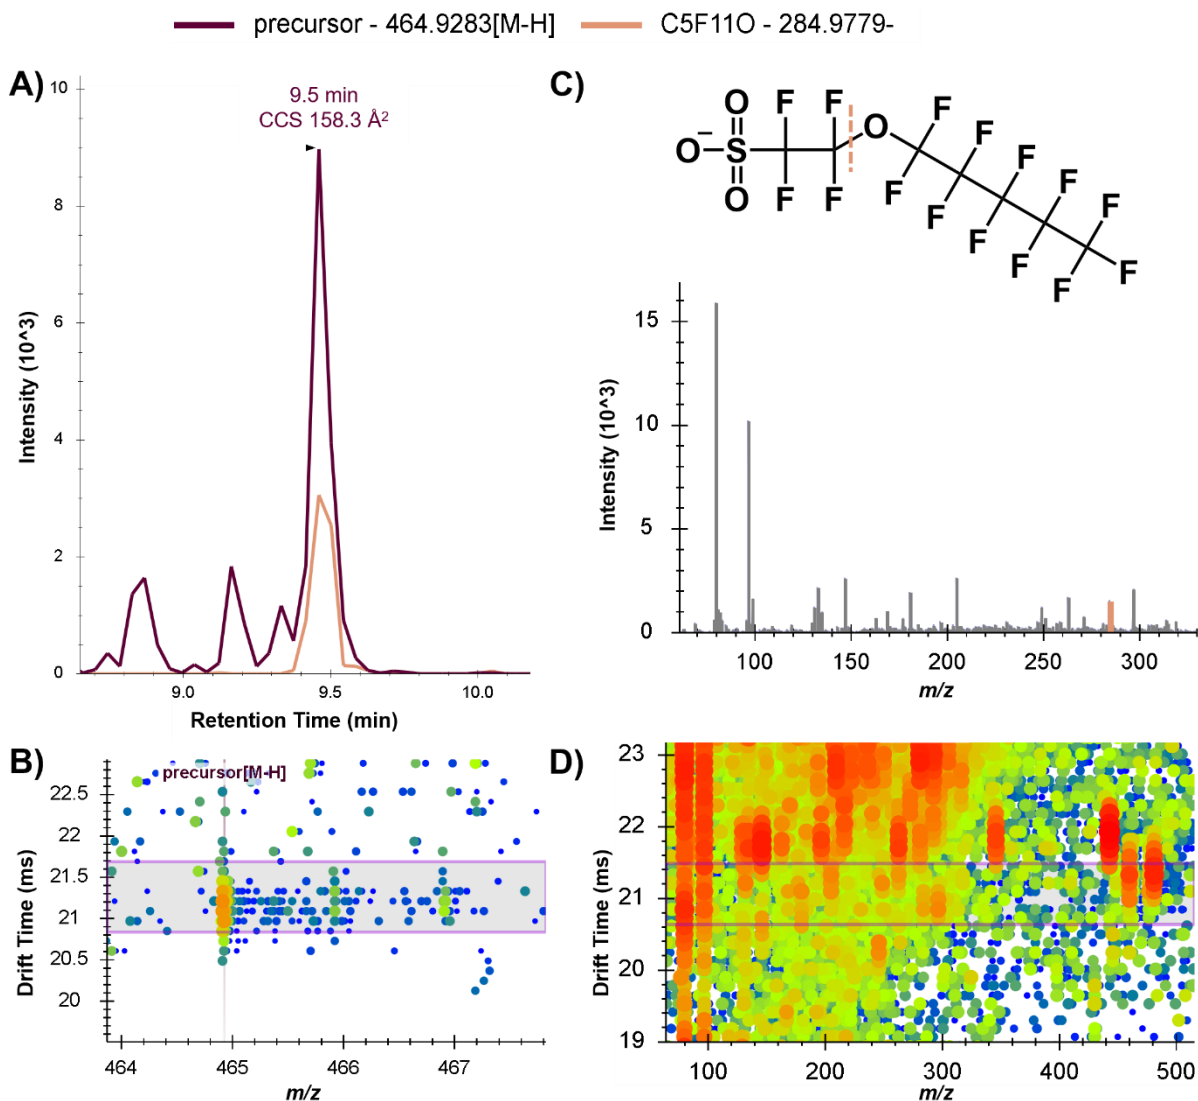

**Fig. S11.**

Compound 6 LC-IMS-CID-MS data. **(A)** Extracted ion chromatogram for the precursor and fragment ion. **(B)** Precursor IMS-MS abundance map. **(C)** MS/MS spectrum with an annotated fragment. **(D)** IMS-MS/MS abundance map displaying interfering fragments from a co-eluting ion at higher and lower drift times.

Note: Nonspecific sulfonate fragments were not annotated here but were detected.

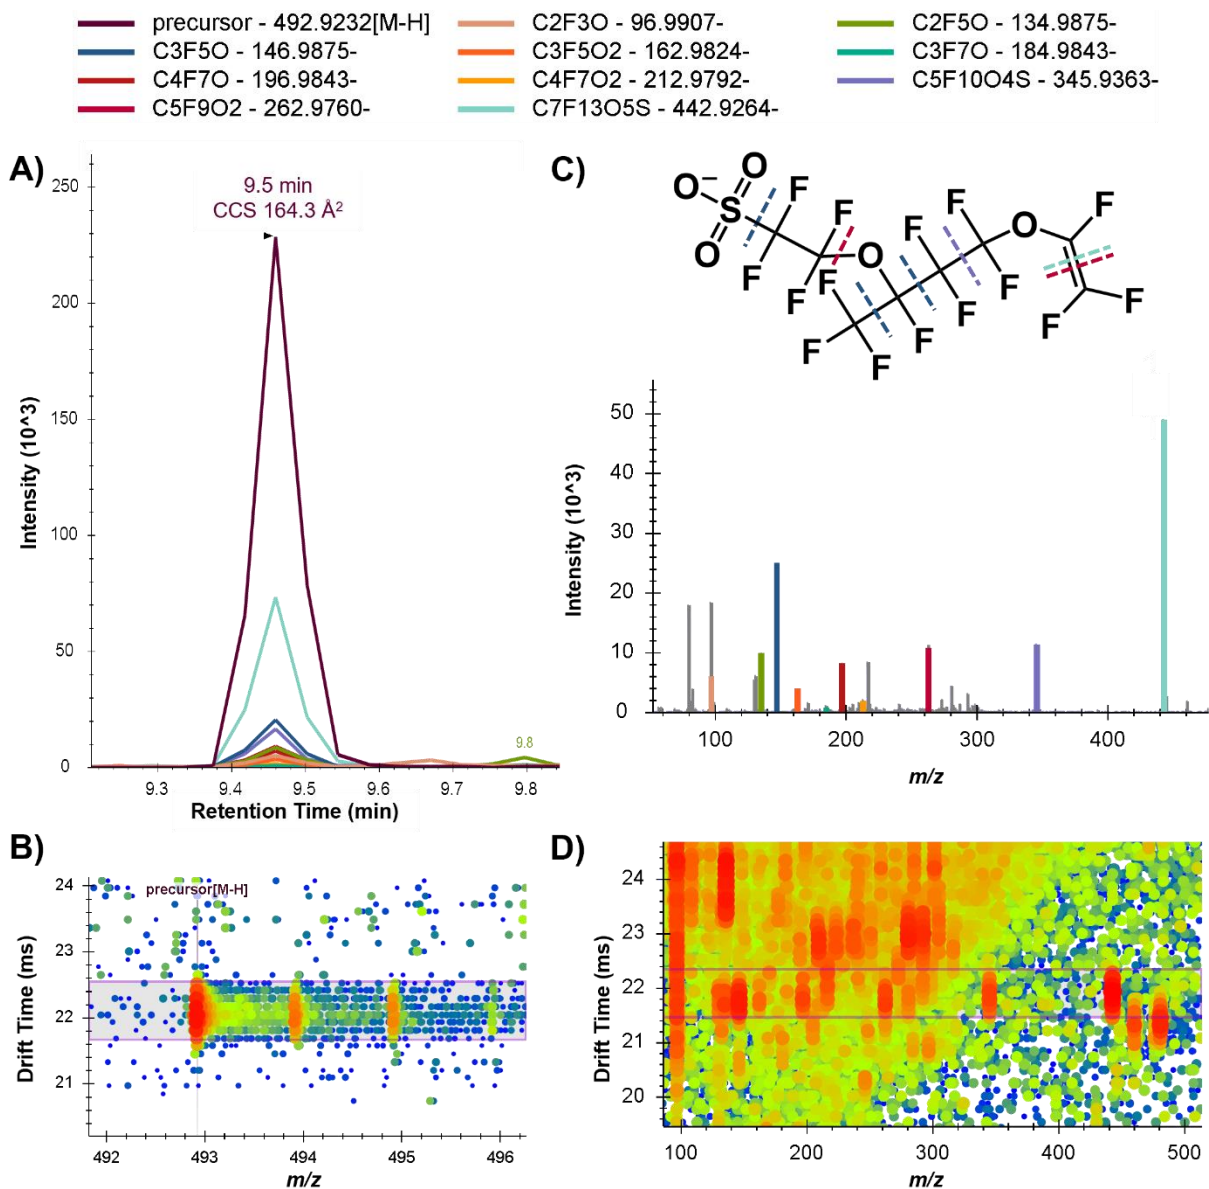

**Fig. S12.**

Compound 7 LC-IMS-CID-MS data. **(A)** Extracted ion chromatogram for the precursor and 10 fragment ions. **(B)** Precursor IMS-MS abundance map. **(C)** MS/MS spectrum with three diagnostic fragments annotated. **(D)** IMS-MS/MS abundance map.

Note: Nonspecific sulfonate fragments were not annotated here but were detected.

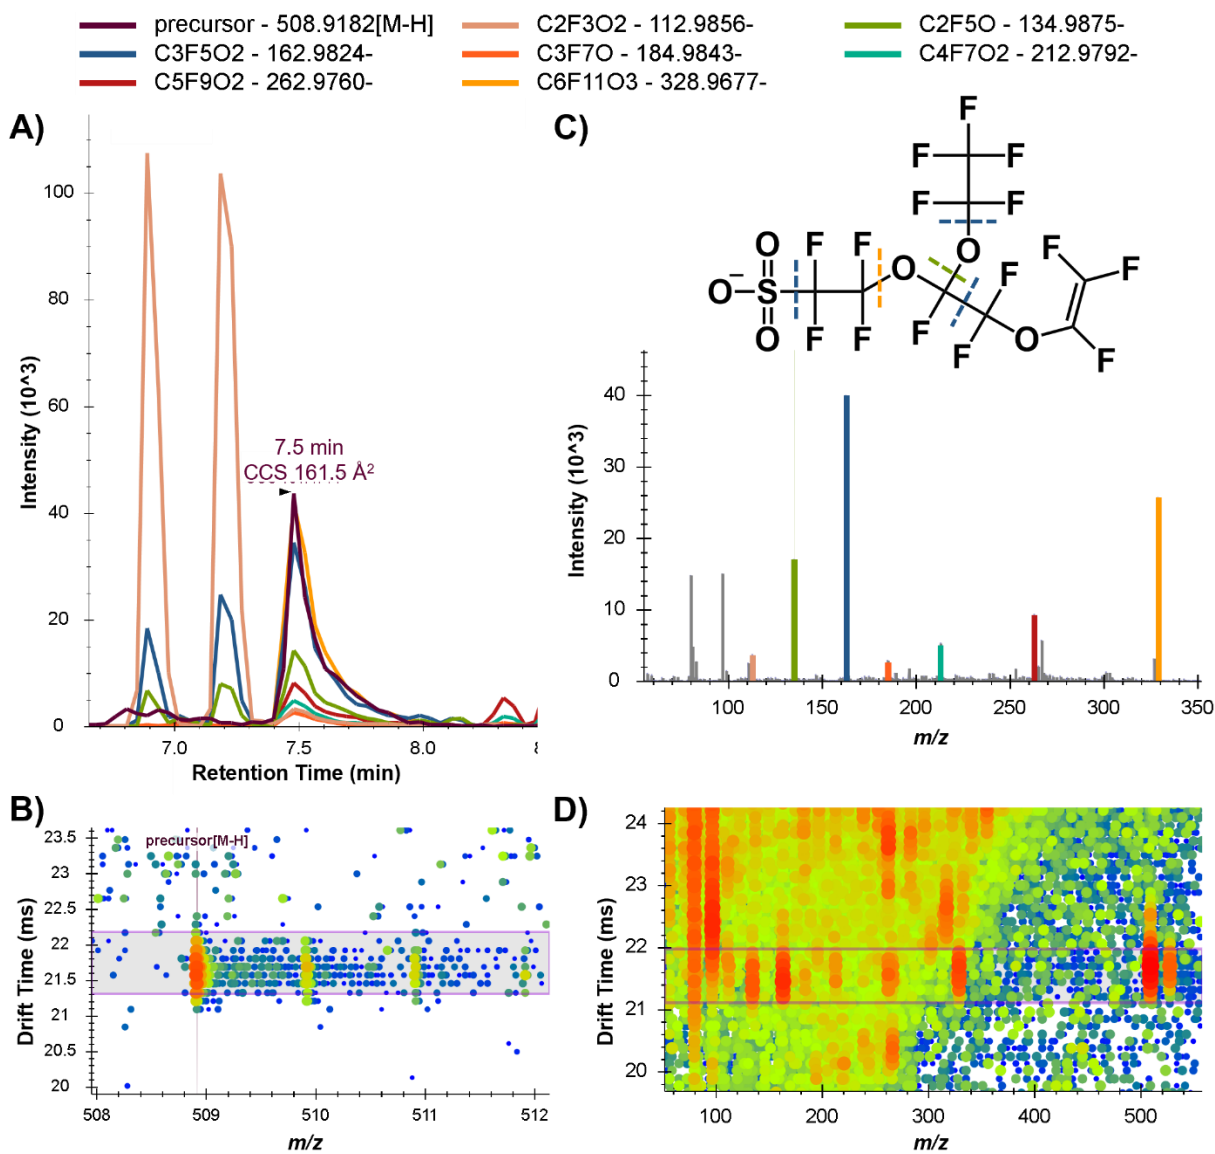

**Fig. S13.**

Compound 8 LC-IMS-CID-MS data. **(A)** Extracted ion chromatogram for the deprotonated precursor and 7 fragment ions. The neighboring peaks are fragment ion signals from other precursors with similar CCS values and shared fragments. **(B)** Precursor IMS-MS abundance map. **(C)** MS/MS spectrum with three diagnostic fragments annotated. **(D)** IMS-MS/MS abundance map.

Note: Nonspecific sulfonate fragments were not annotated here but were detected.

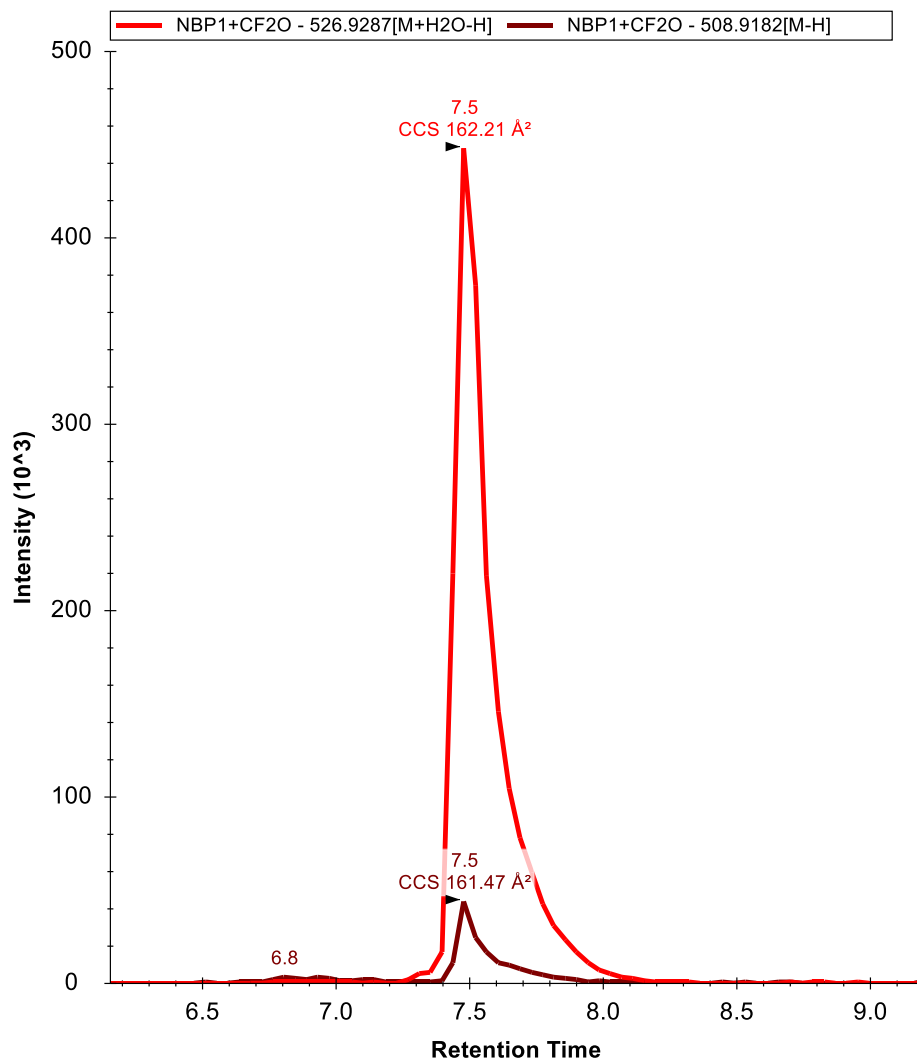

**Fig. S14.**

Overlaid extracted ion chromatograms for the [M-H]<sup>-</sup> and [M+H<sub>2</sub>O-H]<sup>-</sup> adducts of compound 8.

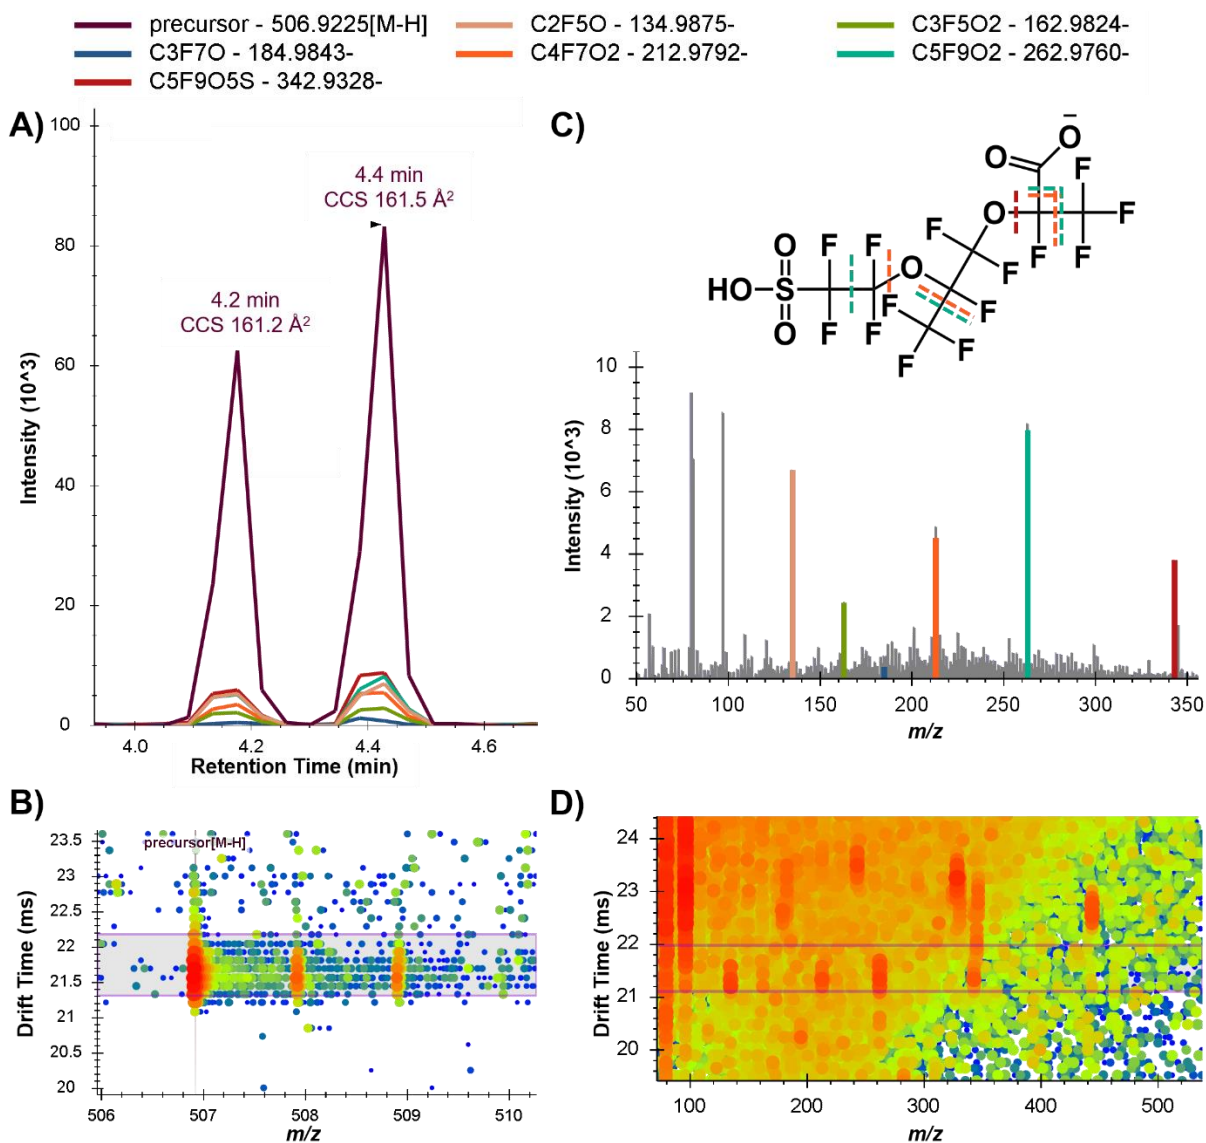

**Fig. S15.**

Compound 9 LC-IMS-CID-MS data. **(A)** Extracted ion chromatogram for the deprotonated precursor and 6 fragment ions. Two potential isomers were detected at 4.2 and 4.4 minutes with similar CCS and fragments. **(B)** Precursor IMS-MS abundance map. **(C)** MS/MS spectrum with three diagnostic fragments annotated. **(D)** IMS-MS/MS abundance map.

Note: Nonspecific sulfonate fragments were not annotated here but were detected.



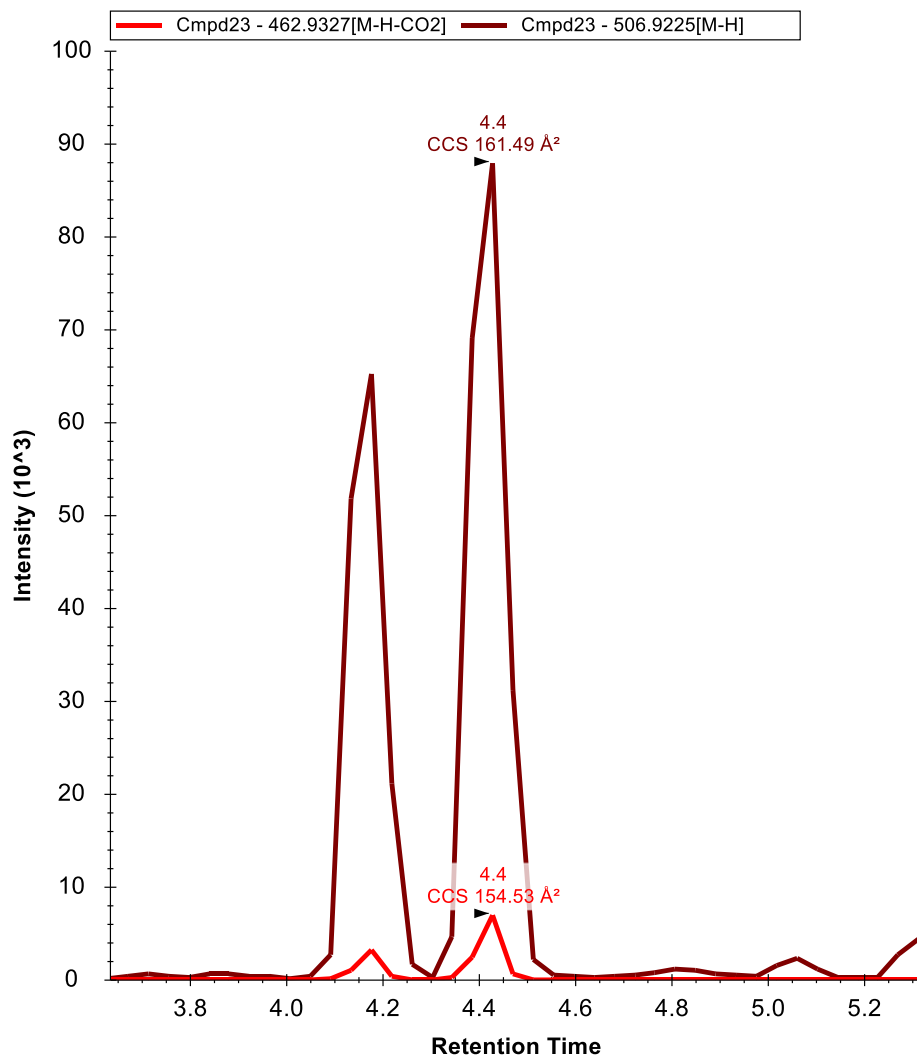

**Fig. S16.**

Overlaid extracted ion chromatograms for the  $[M-H]^-$  and  $[M-H-CO_2]^-$  adducts of compound 9.

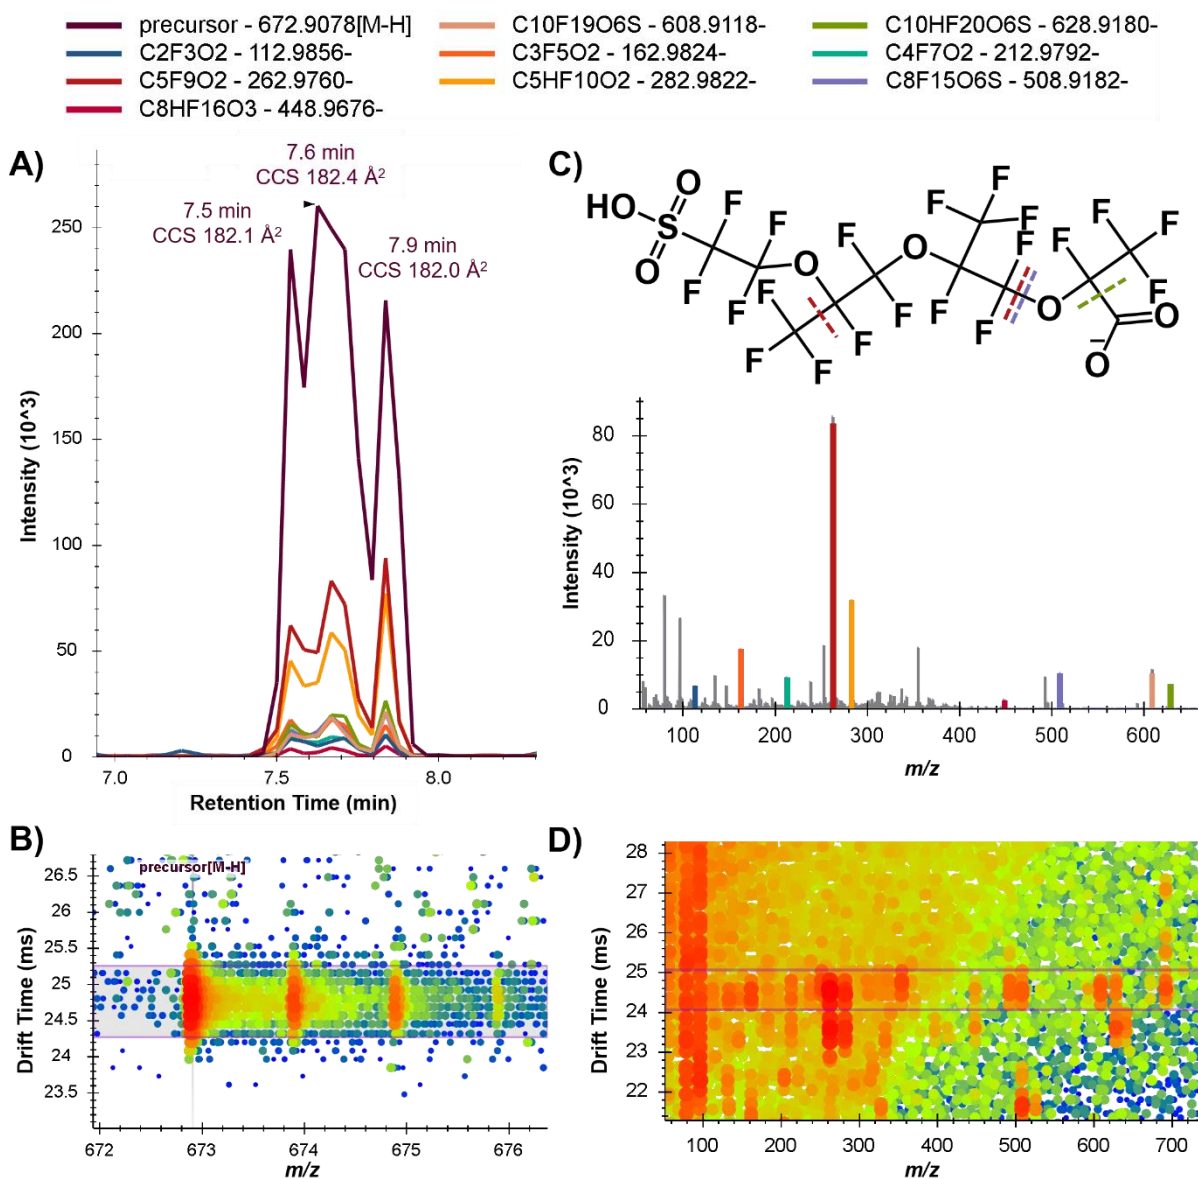

**Fig. S17.**

Compound 10 LC-IMS-CID-MS data. **(A)** Extracted ion chromatogram for the deprotonated precursor and 9 fragment ions. At least three potential unresolved isomers were detected at 7.5, 7.6 and 7.9 minutes with similar CCS and fragments. **(B)** Precursor IMS-MS abundance map. **(C)** MS/MS spectrum with three diagnostic fragments annotated. **(D)** IMS-MS/MS abundance map. Note: Nonspecific sulfonate fragments were not annotated here but were detected.

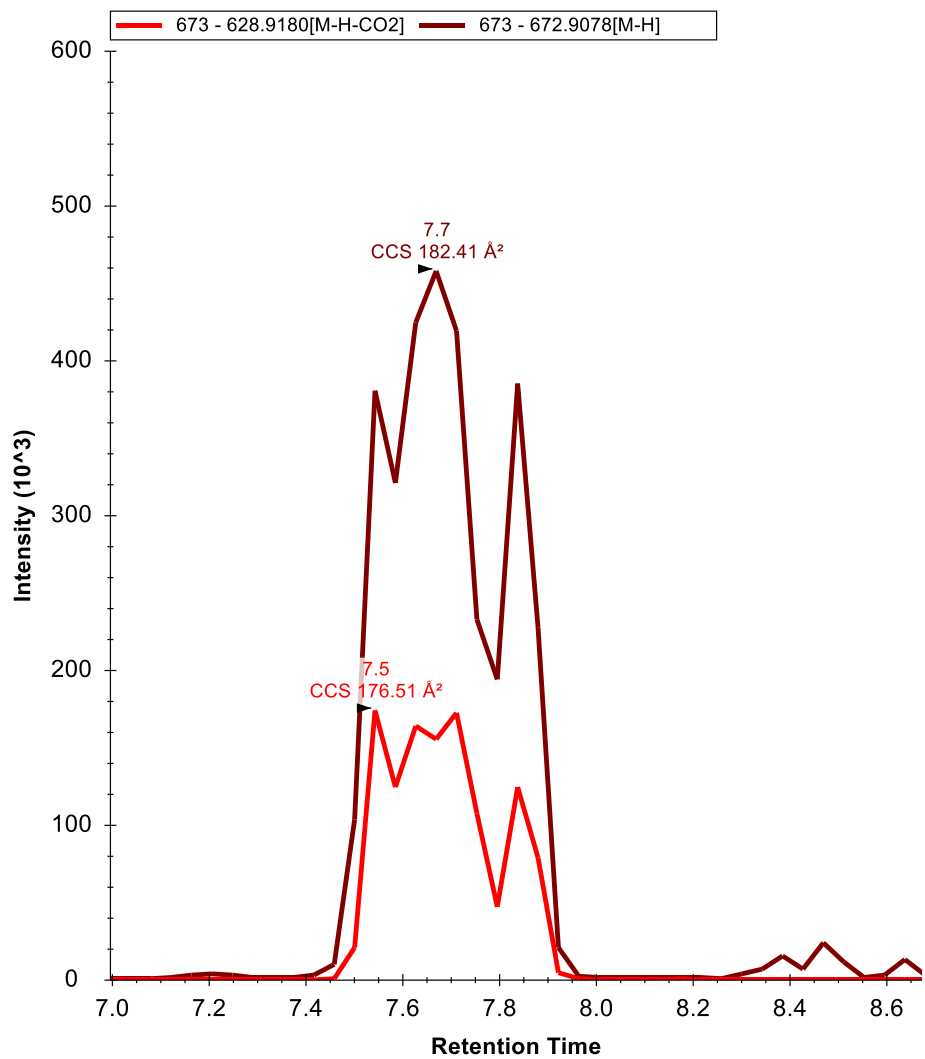

**Fig. S18.**

Overlaid extracted ion chromatograms for the  $[M-H]^-$  and  $[M-H-CO_2]^-$  adducts of compound 10.

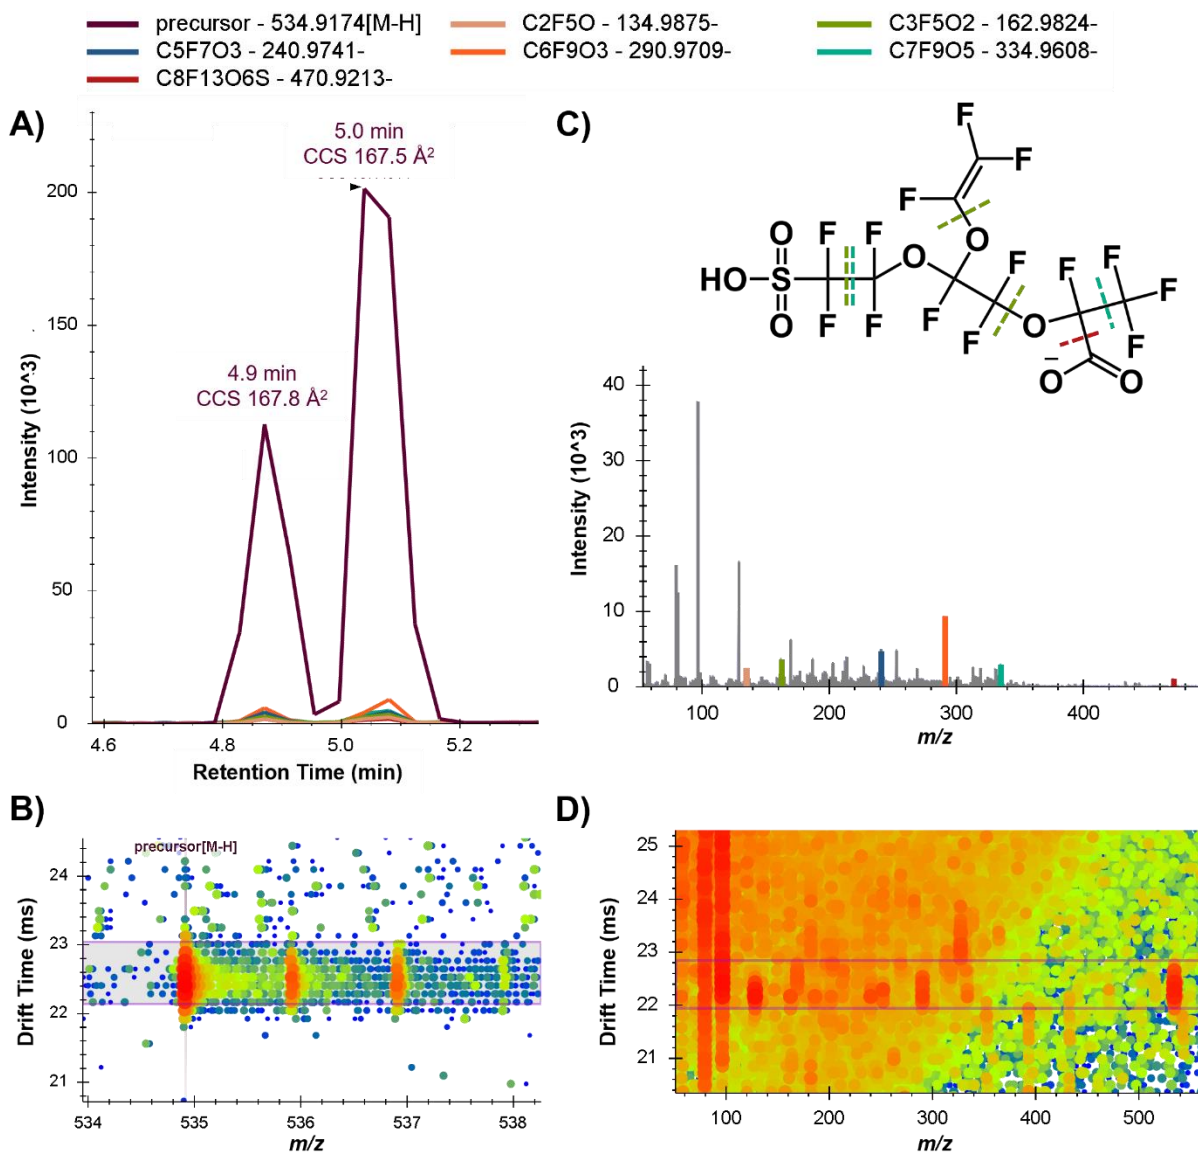

**Fig. S19.**

Compound 11 LC-IMS-CID-MS data. **(A)** Extracted ion chromatogram for the deprotonated precursor and 6 fragment ions. Two potential isomers were detected at 4.9 and 5.0 minutes with similar CCS and fragments. **(B)** Precursor IMS-MS abundance map. **(C)** MS/MS spectrum with three diagnostic fragments annotated. **(D)** IMS-MS/MS abundance map.

Note: Nonspecific sulfonate fragments were not annotated here but were detected.

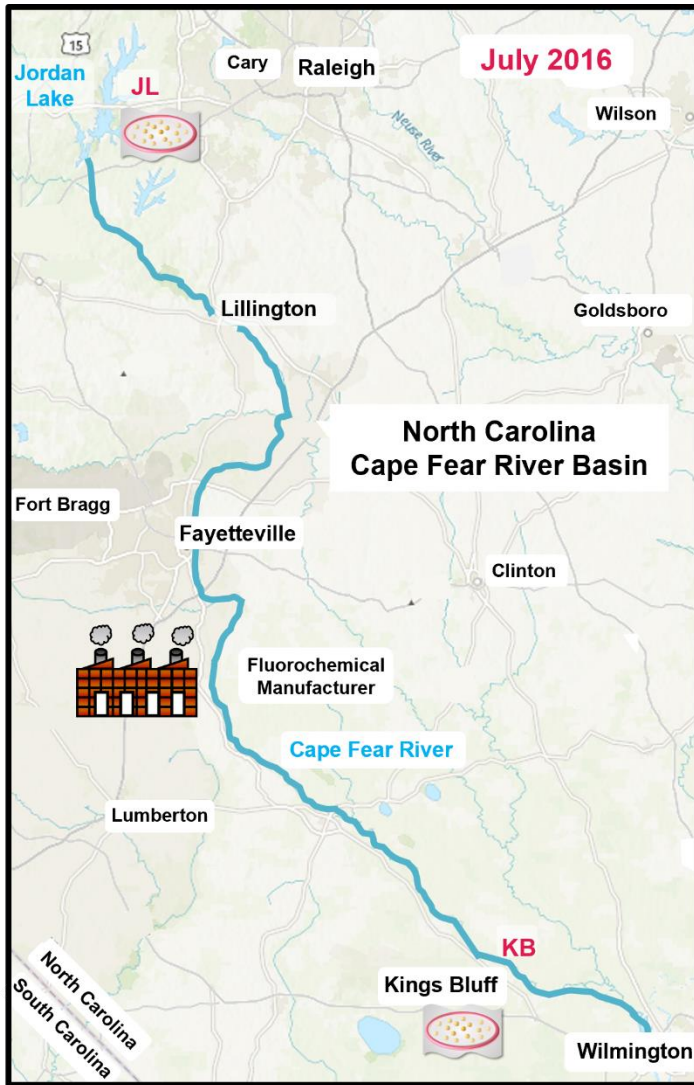

**Fig. S20.**

Map of aquatic passive sampler deployment locations. The control body of water, Jordan Lake (JL), and contaminated body of water, the Kings Bluff (KB) region of the Cape Fear River, are labeled.

| Name                                        | Confidence | Formula     | RT (min) | CCS (Å <sup>2</sup> ) | m/z      | CAS          |
|---------------------------------------------|------------|-------------|----------|-----------------------|----------|--------------|
| PFDS                                        | 1a         | C10HF21O3S  | 11.8     | 186.21                | 598.9238 | 335-77-3     |
| PFNS                                        | 1a         | C9HF19SO3   | 11.1     | 177.24                | 548.9270 | 68259-12-1   |
| PFOS                                        | 1a         | C8HF17O3S   | 10.1     | 168.27                | 498.9302 | 1763-23-1    |
| PFHpS                                       | 1a         | C7HF15O3S   | 9.2      | 159.24                | 448.9334 | 375-92-8     |
| PFHxS                                       | 1a         | C6HF13O3S   | 8.4      | 150.51                | 398.9366 | 355-46-4     |
| PFPeS                                       | 1a         | C5HF11O3S   | 7.0      | 142.20                | 348.9398 | 2706-91-4    |
| PFBS                                        | 1a         | C4HF9O3S    | 5.2      | 133.62                | 298.9430 | 375-73-5     |
| 8Cl-PFOS                                    | 1a         | C8HClF16O3S | 10.7     | 173.33                | 514.9007 | 1651215-26-7 |
| PFECHS                                      | 1a         | C8F15HO3S   | 9.0      | 153.34                | 460.9334 | 335-24-0     |
| PFTTrDA                                     | 1a         | C13HF25O2   | 12.9     | 179.65                | 618.9606 | 72629-94-8   |
| PFD <sub>o</sub> A                          | 1a         | C12HF23O2   | 12.4     | 171.50                | 568.9638 | 307-55-1     |
| PFU <sub>d</sub> A                          | 1a         | C11HF21O2   | 11.8     | 163.36                | 518.9670 | 2058-94-8    |
| PFDA                                        | 1a         | C10HF19O2   | 11.1     | 155.28                | 468.9702 | 335-76-2     |
| PFNA                                        | 1a         | C9HF17O2    | 10.3     | 147.02                | 418.9734 | 375-95-1     |
| PFOA                                        | 1a         | C8HF15O2    | 9.4      | 139.50                | 368.9766 | 335-67-1     |
| PFHpA                                       | 1a         | C7HF13O2    | 8.2      | 132.38                | 318.9798 | 375-85-9     |
| PFHxA                                       | 1a         | C6HF11O2    | 6.7      | 125.10                | 268.9830 | 307-24-4     |
| PFPrA                                       | 1a         | C3HF5O2     | 10.5     | 119.28                | 118.9920 | 422-64-0     |
| 8:2 FTS                                     | 1a         | C10H5F17SO3 | 11.1     | 185.80                | 526.9615 | 39108-34-4   |
| 6:2 FTS                                     | 1a         | C8H5F13SO3  | 9.3      | 168.13                | 426.9679 | 27619-97-2   |
| HFPO-TA (H <sup>+</sup> dimer)              | 1a         | C18H2F34O8  | 10.7     | 240.87                | 990.9128 | 13252-14-7   |
| PFO5D <sub>o</sub> A (H <sup>+</sup> dimer) | 1a         | C14H2F26O14 | 10.2     | 233.35                | 886.8951 | 39492-91-6   |
| PFO4DA (H <sup>+</sup> dimer)               | 1a         | C12H2F22O12 | 8.9      | 217.05                | 754.9117 | 39492-90-5   |
| PFO3OA (H <sup>+</sup> dimer)               | 1a         | C10H2F18O10 | 6.9      | 198.95                | 622.9282 | 39492-89-2   |
| Hydro-EVE                                   | 1a         | C8H2F14O4   | 8.3      | 151.20                | 426.9651 | 773804-62-9  |
| HFPO-DA (GenX)*                             | 1a         | C6HF11O3    | 7.1      | 127.46                | 284.9779 | 13252-13-6   |
| Nafion byproduct 1                          | 1a         | C7HF13O5S   | 9.1      | 156.20                | 442.9264 | 29311-67-9   |
| Nafion byproduct 2                          | 1a         | C7H2F14O5S  | 8.5      | 155.21                | 462.9327 | 749836-20-2  |
| Nafion byproduct 4                          | 1a         | C7H2F12O6S  | 2.8      | 151.27                | 440.9308 |              |

|                      |    |              |      |        |          |              |
|----------------------|----|--------------|------|--------|----------|--------------|
| Nafion byproduct 5   | 1a | C7H3F11O7S   | 3.0  | 152.91 | 438.9351 |              |
| Nafion byproduct 6   | 1a | C6H2F12O4S   | 8.5  | 146.16 | 396.9409 |              |
| PFEESA               | 1a | C4HF9O4S     | 6.3  | 137.99 | 314.9379 | 113507-82-7  |
| NVHOS                | 1a | C4H2F8O4S    | 3.4  | 132.93 | 296.9473 | 801209-99-4  |
| FOSAA                | 1a | C10H4F17NO4S | 10.5 | 181.66 | 555.9517 | 2806-24-8    |
| FHxSA                | 1a | C6H2F13SO2N  | 9.8  | 151.96 | 397.9526 | 41997-13-1   |
| FBSA                 | 1a | C4H2F9SO2N   | 6.7  | 134.99 | 297.9590 | 30334-69-1   |
| Compound 1           | 2a | C5H2F10O4S   | 6.3  | 143.73 | 346.9441 | 935443-55-3  |
| Compound 2           | 2b | C5H2F10O4S   | 5.3  | 140.15 | 346.9441 |              |
| Compound 3           | 2b | C6H2F12O5S   | 7.3  | 148.21 | 412.9359 |              |
| Compound 4 (PFPrESA) | 2a | C5HF11O4S    | 7.1  | 144.36 | 364.9347 |              |
| Compound 5 (PFBESA)  | 2b | C6HF13O4S    | 8.4  | 150.85 | 414.9315 |              |
| Compound 6 (PFPeESA) | 2b | C7HF15O4S    | 9.5  | 158.32 | 464.9283 |              |
| Compound 7           | 2b | C8HF15O5S    | 9.5  | 164.26 | 492.9232 |              |
| Compound 8           | 3b | C8HF15O6S    | 7.5  | 162.21 | 526.9287 |              |
| Compound 9           | 2a | C8H2F14O7S   | 4.4  | 154.53 | 462.9327 | 1235024-21-1 |
| Compound 10          | 3b | C11H2F20O8S  | 7.7  | 182.41 | 672.9078 |              |
| Compound 11          | 3b | C9H2F14O8S   | 5.0  | 197.45 | 534.9174 |              |
| Unknown 1            | 4  | C8H2F13O3S   | 9.3  | 165.86 | 424.9484 |              |
| Unknown 2            | 4  | C8H3F16O4S   | 7.3  | 159.53 | 497.9424 |              |
| Unknown 3            | 4  | C9H2F16O6S   | 5.4  | 163.87 | 540.9244 |              |
| Unknown 4            | 4  | C9H4F16O8S   | 8.5  | 170.69 | 574.9299 |              |

|               |     |    |      |        |          |  |
|---------------|-----|----|------|--------|----------|--|
| Unknown<br>5  | n/a | 5b | 10.6 | 116.1  | 184.9843 |  |
| Unknown<br>6  | n/a | 5b | 10.6 | 134.96 | 334.9747 |  |
| Unknown<br>7  | n/a | 5b | 7.6  | 156.21 | 458.9555 |  |
| Unknown<br>8  | n/a | 5b | 6.9  | 160.01 | 474.9491 |  |
| Unknown<br>9  | n/a | 5b | 5    | 174.59 | 525.9392 |  |
| Unknown<br>10 | n/a | 5b | 5.3  | 179.55 | 568.9573 |  |

**Table S1.**

Detected known and unknown PFAS. Identification confidence scores are assigned based on the framework from Charbonnet *et al.*(62)

\*Observed as decarboxylated ion rather than deprotonated. Reported  $m/z$  corresponds to the detected ion ( $[M-H-CO_2]^-$ ).



| <b>Name</b>        | <b>Formula</b> | <b>ID(24)</b> | <b>Agreement</b>             |
|--------------------|----------------|---------------|------------------------------|
| HFPO-DA (GenX)     | C6HF11O3       | 7             | Same structure assigned      |
| Nafion byproduct 1 | C7HF13O5S      | 16            | Same structure assigned      |
| Nafion byproduct 2 | C7H2F14O5S     | 34            | Same structure assigned      |
| Nafion byproduct 4 | C7H2F12O6S     | 22            | Same structure assigned      |
| Nafion byproduct 5 | C7H3F11O7S     | 21            | Same structure assigned      |
| Nafion byproduct 6 | C6H2F12O4S     | 28            | Same structure assigned      |
| PFO4DA             | C6HF11O6       | 10            | Same structure assigned      |
| PFO3OA             | C5HF9O5        | 6             | Same structure assigned      |
| Hydro-EVE          | C8H2F14O4      | 29            | Same structure assigned      |
| NVHOS              | C4H2F8O4S      | 26            | Same structure assigned      |
| PFEESA             | C4HF9O4S       | 14            | Same structure assigned      |
| Compound 1         | C5H2F10O4S     | 27            | Same structure assigned      |
| Compound 3         | C6H2F12O5S     | 33            | Isomeric structures assigned |
| Compound 4         | C5HF11O4S      | 15            | Same structure assigned      |
| Compound 7         | C8HF15O5S      | 17            | Isomeric structures assigned |
| Compound 9         | C8H2F14O7S     | 23            | Same structure assigned      |
| Unknown 3          | C9H2F16O6S     | 35            | No structure assigned        |

**Table S2.**

Comparison of identification overlap between this study and McCord & Strynar.(24)

| <b>Parameter</b>       | <b>Value</b> | <b>Units</b> |
|------------------------|--------------|--------------|
| Gas Temperature        | 230          | °C           |
| Drying Gas             | 11           | L/min        |
| Nebulizer              | 25           | psi          |
| Sheath Gas Temperature | 350          | °C           |
| Sheath Gas Flow        | 12           | L/min        |
| $V_{\text{cap}}$       | 2000         | V            |
| Nozzle Voltage         | 0            | V            |

**Table S3.**  
Ionization source settings

| <b>Parameter</b>    | <b>Value</b> | <b>Units</b>             |
|---------------------|--------------|--------------------------|
| Mass Range          | 50-1700      | <i>m/z</i>               |
| Trap Fill Time      | 20000        | $\mu$ s                  |
| Trap Release Time   | 300          | $\mu$ s                  |
| Frame Rate          | 0.9          | Frames/s                 |
| IM Transient Rate   | 17           | IM Transients/Frame      |
| Max Drift Time      | 60           | ms                       |
| TOF Transient Rate  | 502          | Transients/IM Transients |
| Drift Tube Entrance | -1574        | V                        |
| Drift Tube Exit     | -224         | V                        |

**Table S4.**  
IMS-MS settings

| <b>Drift Time (ms)</b> | <b>Collision Energy (V)</b> |
|------------------------|-----------------------------|
| 0                      | 2                           |
| 10                     | 5                           |
| 15                     | 19                          |
| 21                     | 32                          |
| 25                     | 41                          |
| 35                     | 53                          |
| 45                     | 60                          |
| 60                     | 60                          |

**Table S5.**  
CE ramp settings
